# Supplementary material for: (R)-(+)-3,5-Dinitro-N-(1-phenylethyl)benzothioamide
Source: PubMed Central journal article supplement (PMC10810360; doi:10.3390/m1650), 2023-05-20
Supplement: NIHMS1960482-supplement-SI_Data.pdf [file NIHMS1960482-supplement-SI_Data.pdf]

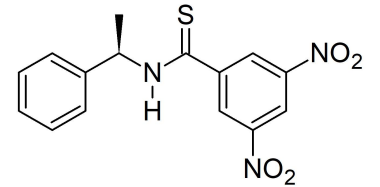

3,5-dinitro-*N*-[(1*R*)-1-phenylethyl]  
benzene-1-carbothioamide  
InChI Key: JQRKUKGQZCQJHX-  
SNVBAGLBSA-N

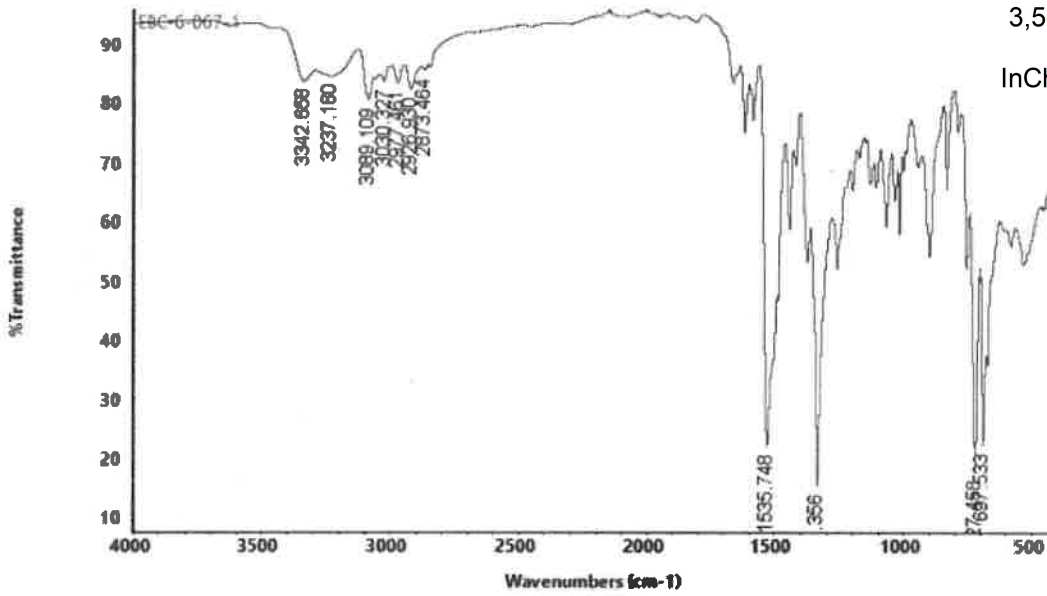

Title: EBC-6-067-1

Number of sample scans: 16

Number of background scans: 16

Instrument Serial: BDM1910286

Smart Accy: V70520

Model: Summit

Source: IR

Detector: DTGS KBr

Smart Accessory Title: Everest ATR

Smart Accessory ID: V70520

Crystal type: : None

Beamsplitter: KBr

Sample spacing: 1.0

Digitizer bits: 24

Optical velocity: 0.4747

Aperture: 100.0

Sample gain: 1.0

High pass filter: 1.0

Low pass filter: 11000.0

Comments: None

Regions:

Region 1: 3477.39-2805.65

Threshold: 87.29

Sensitivity: 50.00

Region 2: 1675.05-582.28

Threshold: 40.44

Sensitivity: 50.00

| Position | Intensity |
|----------|-----------|
| 2873.46  | 85.53     |
| 2926.93  | 82.43     |
| 2977.46  | 83.43     |
| 3030.33  | 83.72     |
| 3089.11  | 80.54     |
| 3237.18  | 84.62     |
| 3342.66  | 83.68     |
| 697.53   | 22.27     |
| 727.46   | 17.73     |
| 1340.36  | 15.42     |
| 1535.75  | 22.00     |

1H NMR (CDCl3, 400 MHz)

NAME EBC-6-067-1  
 EXPNO 10  
 PROCNO 1  
 Date\_ 20200714  
 Time\_ 22.14 h  
 INSTRUM spect  
 PROBHD Z108618\_0161 (  
 PULPROG zg30  
 TD 65536  
 SOLVENT CDCl3  
 NS 16  
 DS 2  
 SWH 8012.820 Hz  
 FIDRES 0.244532 Hz  
 AQ 4.0894966 sec  
 RG 90.5  
 DW 62.400 usec  
 DE 6.50 usec  
 TE 297.9 K  
 D1 1.00000000 sec  
 TD0 1  
 SFO1 400.1724710 MHz  
 NUC1 1H  
 P1 9.88 usec  
 SI 65536  
 SF 400.1700120 MHz  
 WDW EM  
 SSB 0  
 LB 0.30 Hz  
 GB 0  
 PC 1.00

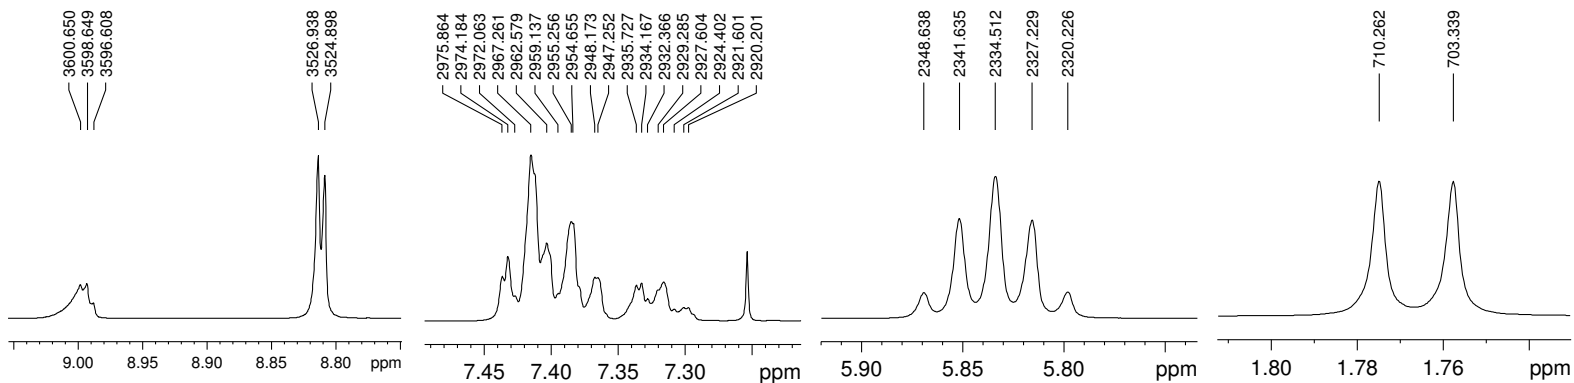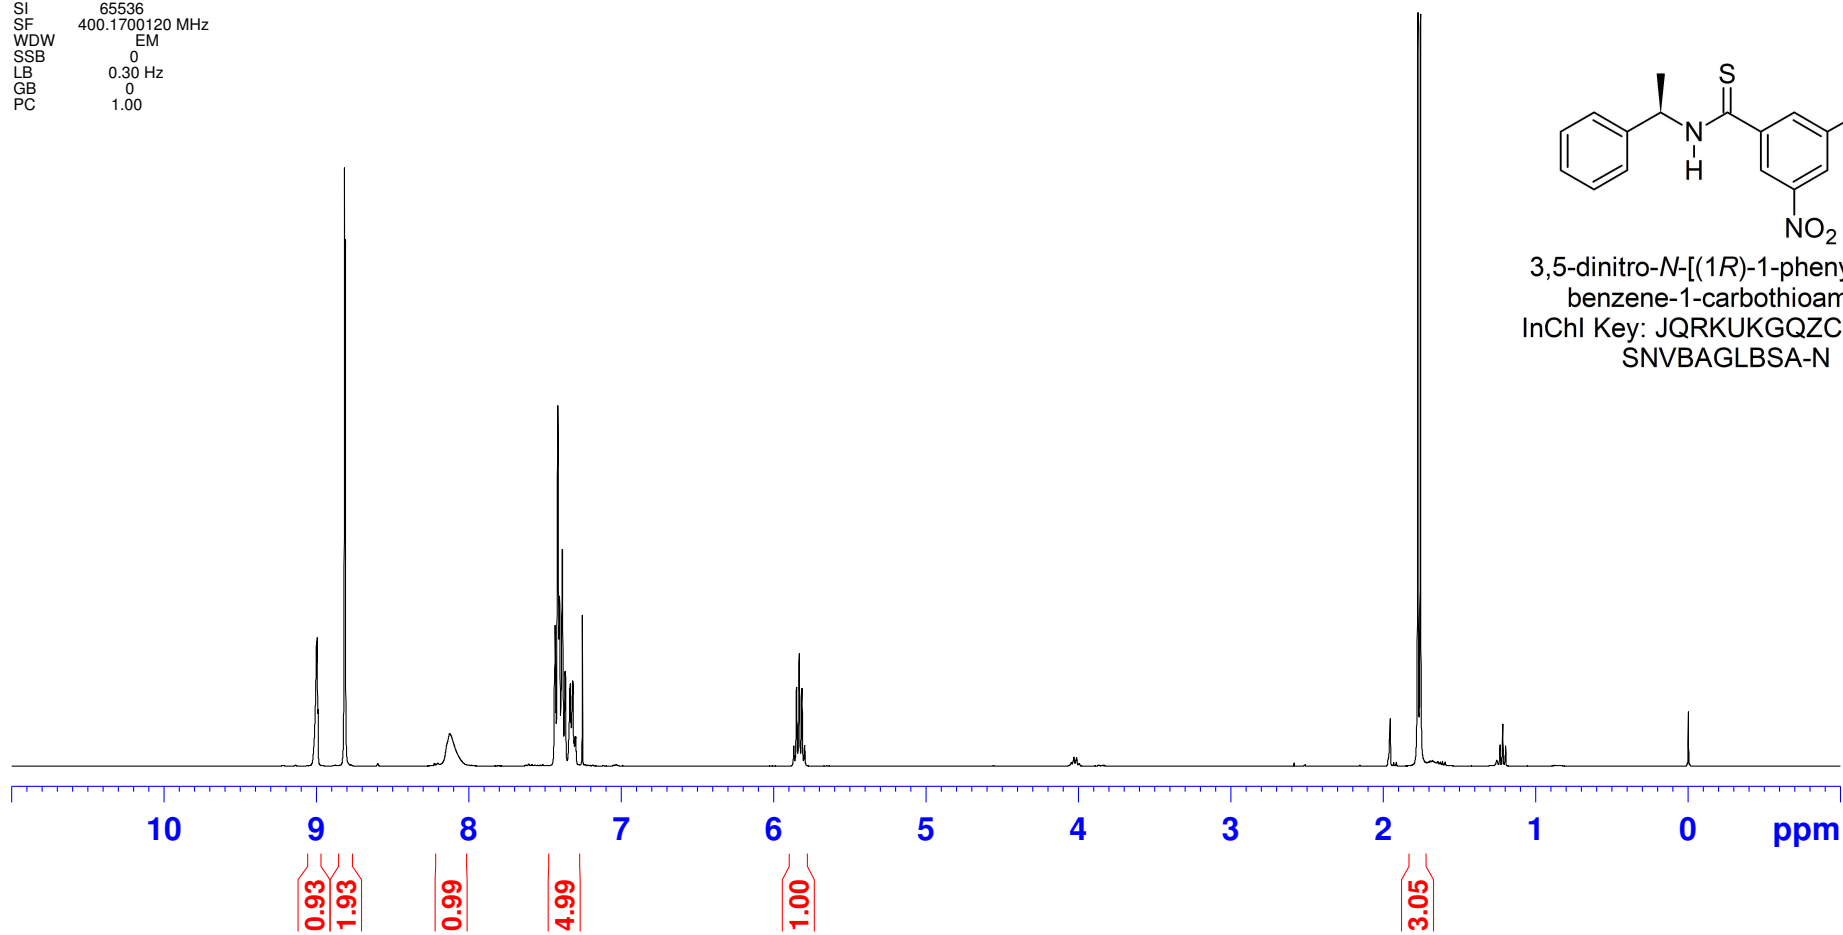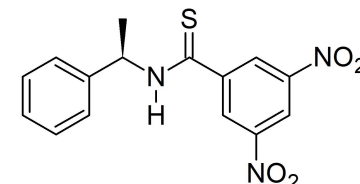

3,5-dinitro-N-[(1R)-1-phenylethyl]  
 benzene-1-carbothioamide  
 InChI Key: JQRKUKGQZCQJHX-SNVBAGLBSA-N

1H-1H COSY(CDCl3, 400 MHz)

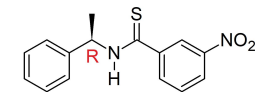

3,5-dinitro-N-[(1R)-1-phenylethyl]  
benzene-1-carbothioamide  
InChI Key: JQRKUKGQZCQJHX-  
SNVBAGLBSA-N

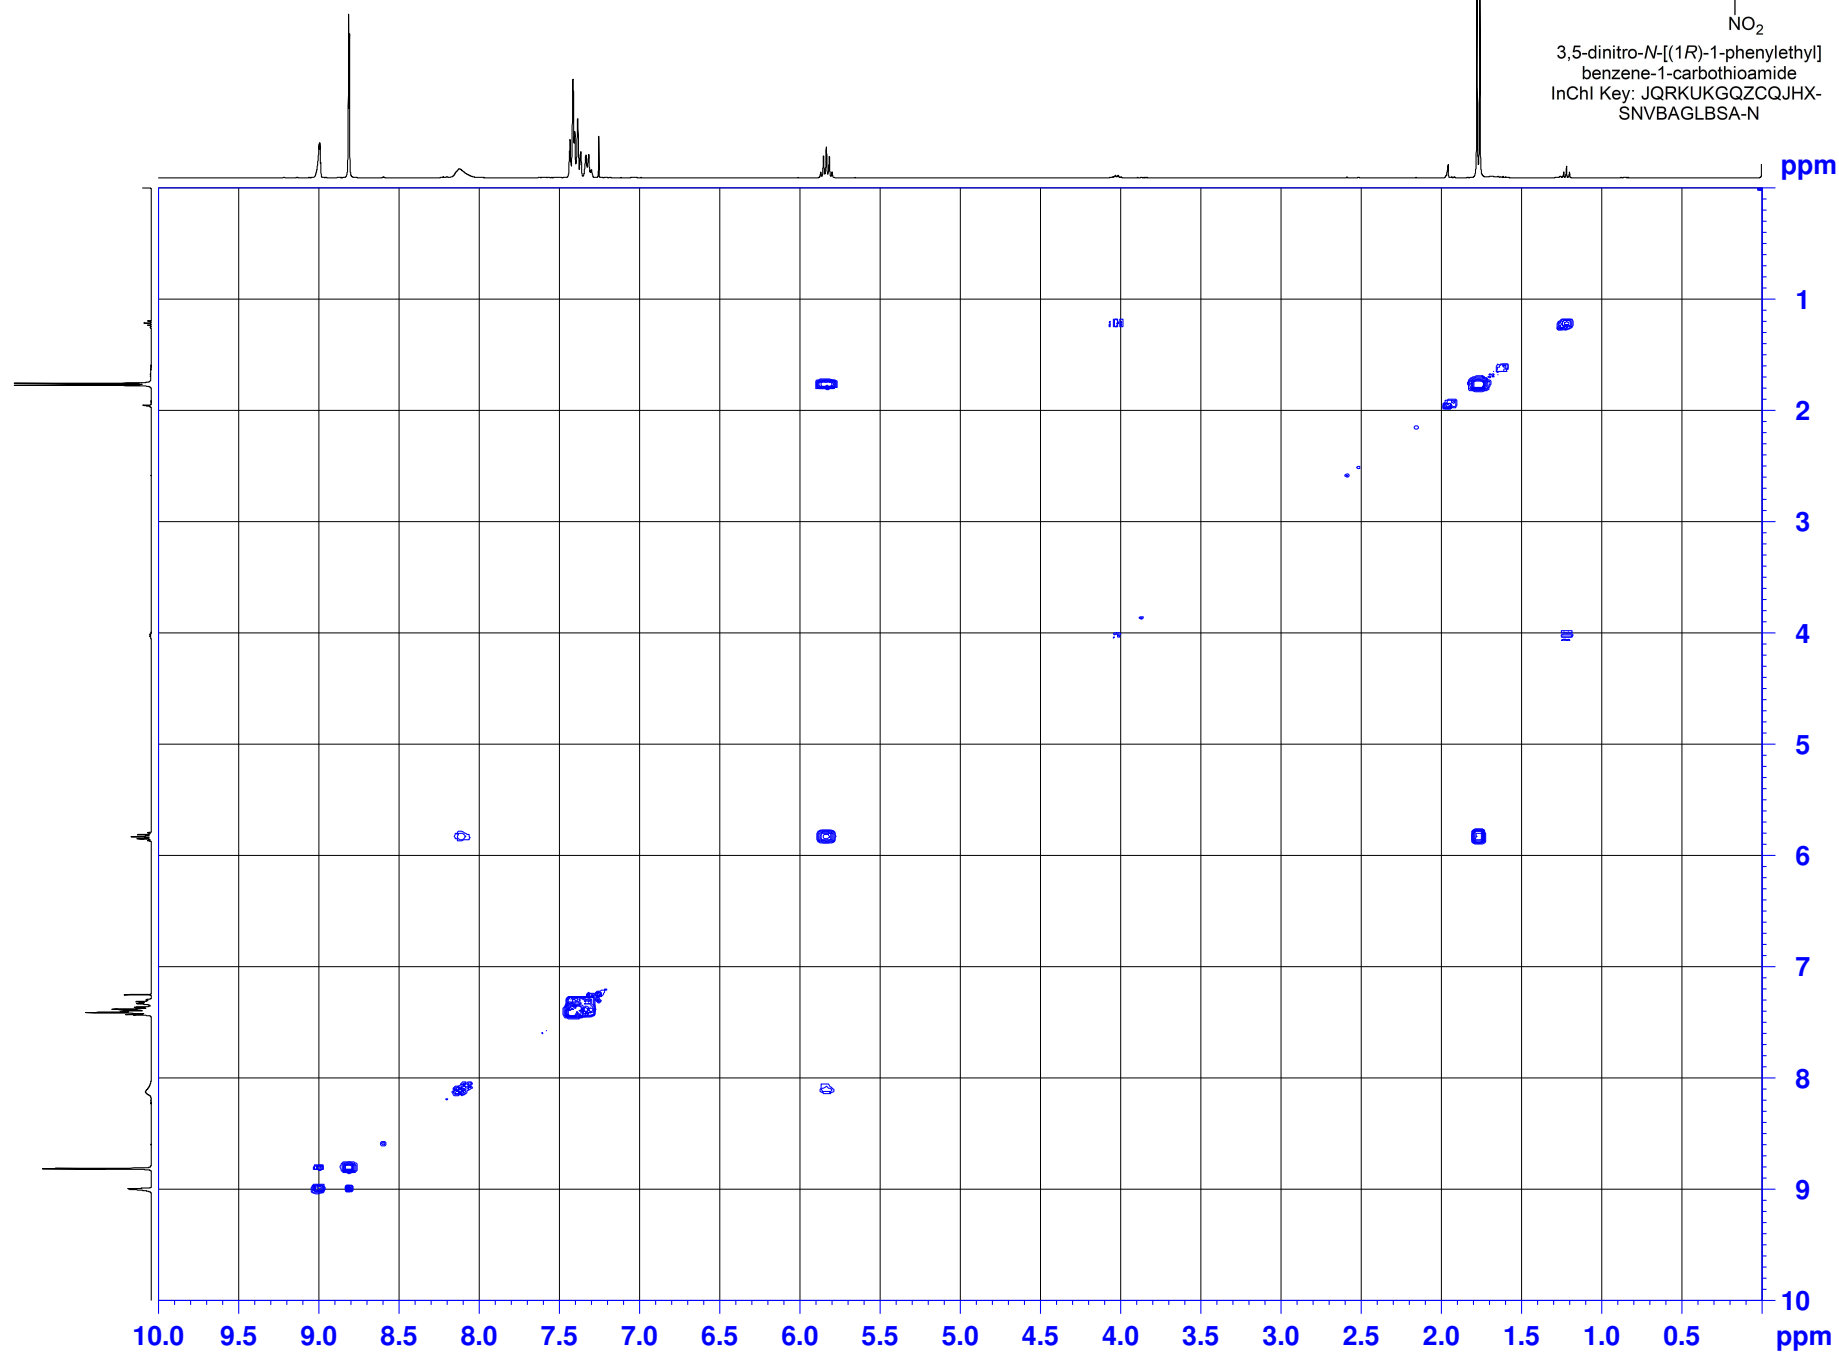

1 <sup>13</sup>C NMR (CDCl<sub>3</sub>, 400 MHz)

```

NAME          EBC-6-067-1
EXPNO         12
PROCNO        1
Date_         20200714
Time          23.31 h
INSTRUM       spect
PROBHD        Z108618_0161 (
PULPROG       deptsp135
TD            65536
SOLVENT       CDCl3
NS            256
DS            8
SWH           24038.461 Hz
FIDRES        0.733596 Hz
AQ            1.3631988 sec
RG            203
DW            20.800 usec
DE            6.50 usec
TE            298.5 K
CNST2         145.0000000
D1            2.0000000 sec
D2            0.00344828 sec
D12           0.00002000 sec
TD0           1
SFO1          100.6328888 MHz
NUC1          13C
P1            8.40 usec
P13           2000.00 usec
SI            32768
SF            100.6228265 MHz
WDW           EM
SSB           0
LB            1.00 Hz
GB            0
PC            1.40
    
```

13C-DEPT90

13C-DEPT135

13C Spectrum

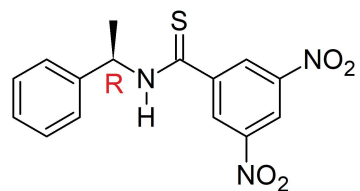

3,5-dinitro-*N*-[(1*R*)-1-phenylethyl]  
benzene-1-carbothioamide  
InChI Key: JQRKUKGQZCQJHX-  
SNVBAGLBSA-N

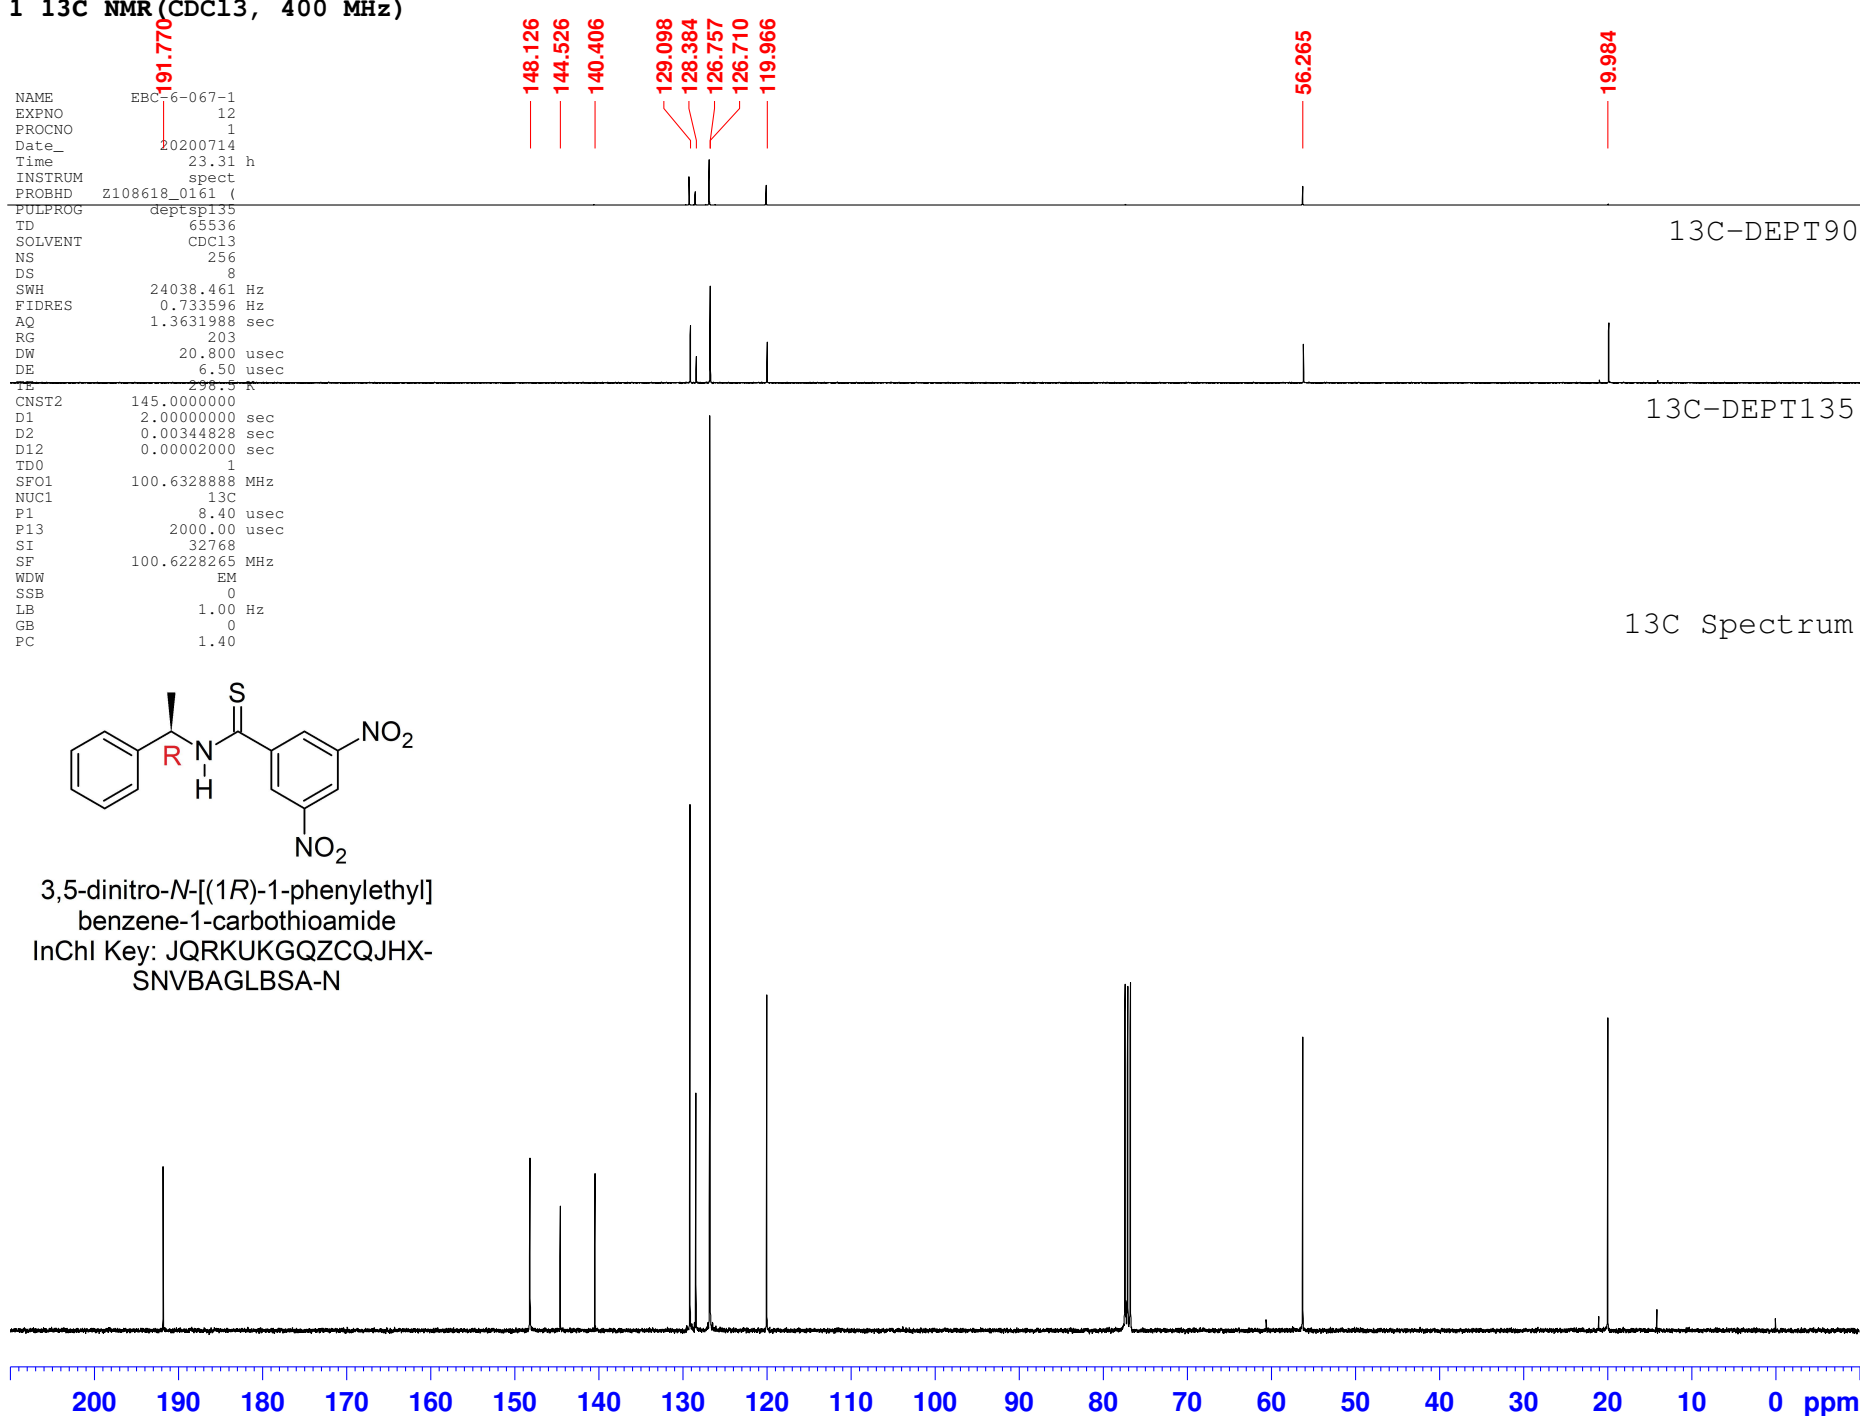

1 <sup>1</sup>H-<sup>13</sup>C HSQC (CDCl<sub>3</sub>, 400 MHz)

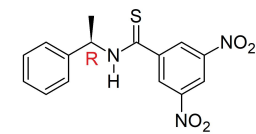

3,5-dinitro-N-[(1R)-1-phenylethyl]  
benzene-1-carbothioamide  
InChI Key: JQRKUKGQZCQJHX-  
SNVBAGLBSA-N

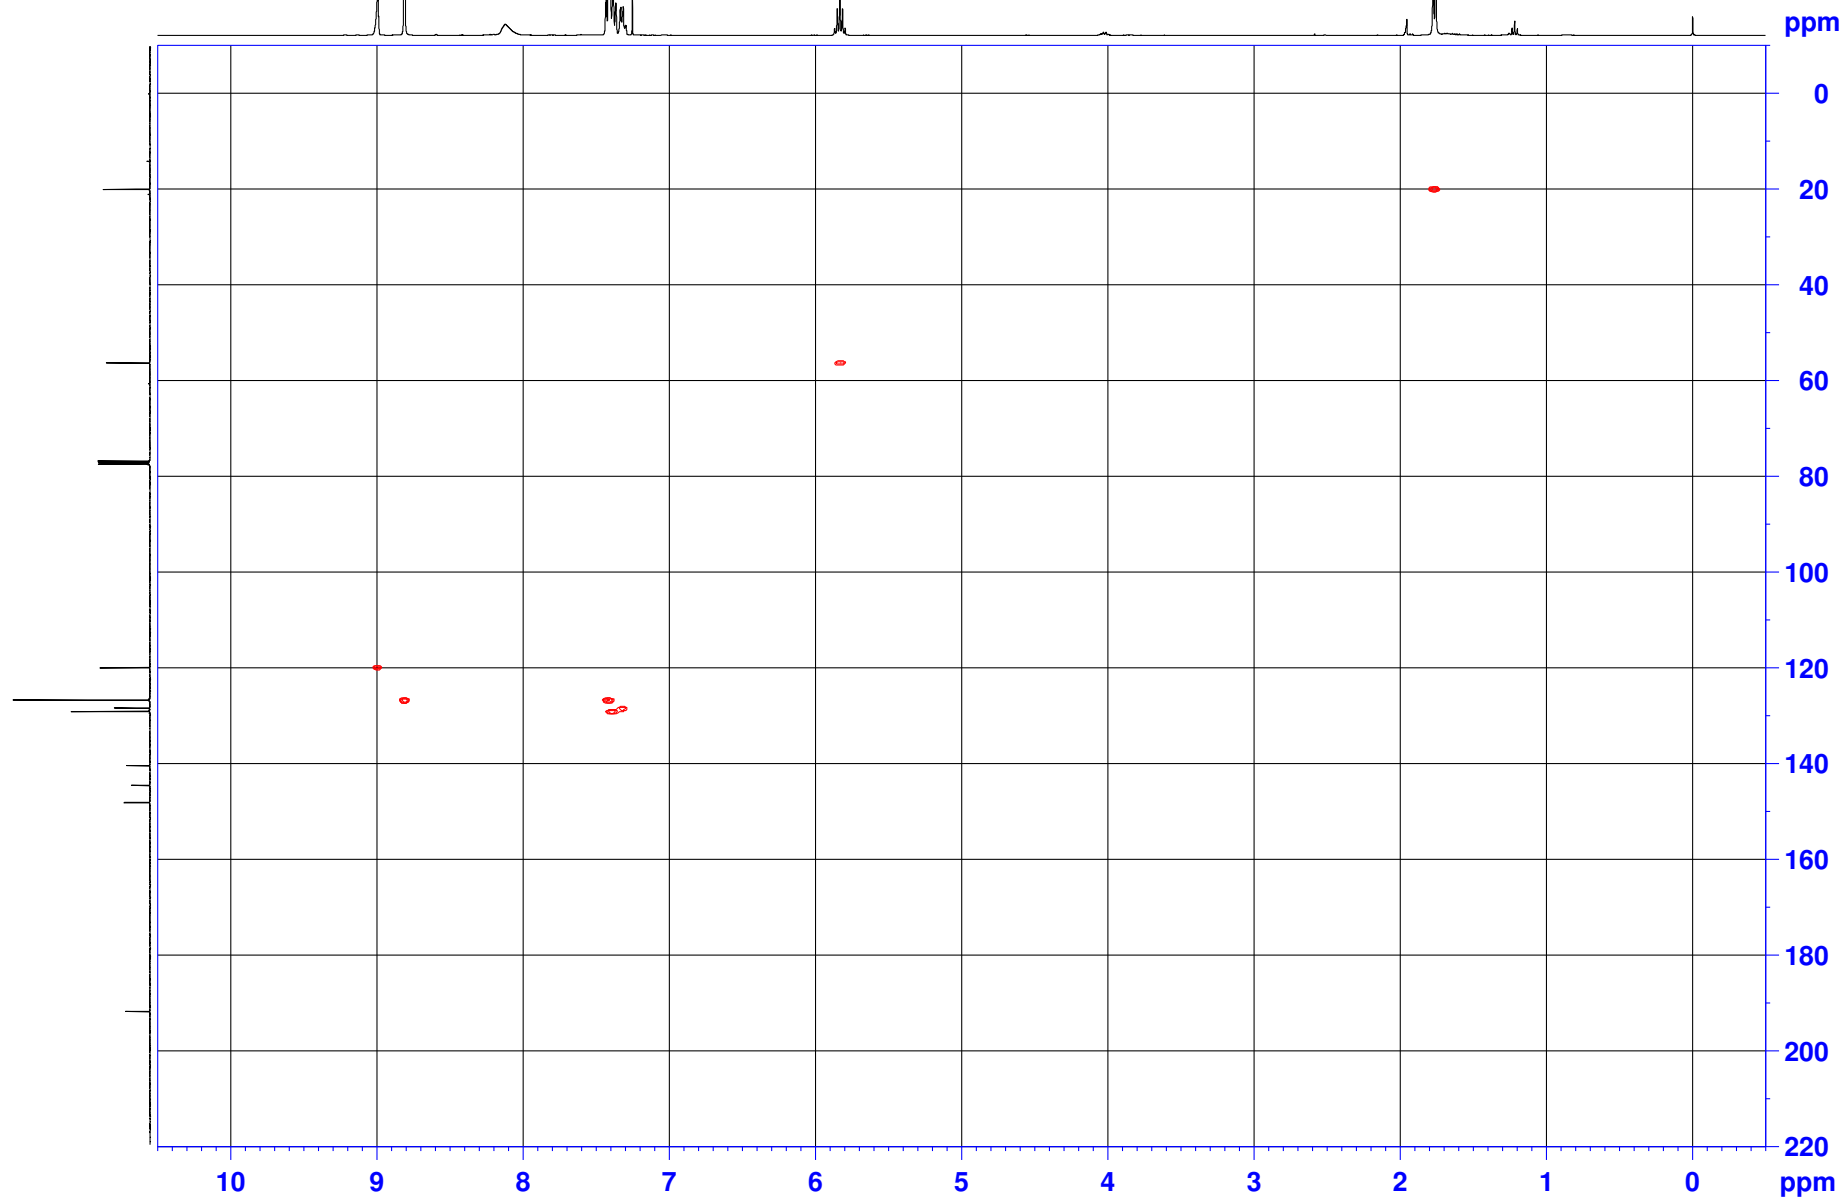

1 <sup>1</sup>H-<sup>13</sup>C HMBC (CDCl<sub>3</sub>, 400 MHz)

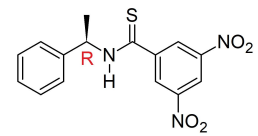

3,5-dinitro-*N*-[(1*R*)-1-phenylethyl]  
benzene-1-carbothioamide  
InChI Key: JQRKUKGQZCQJHX-  
SNVBAGLBSA-N

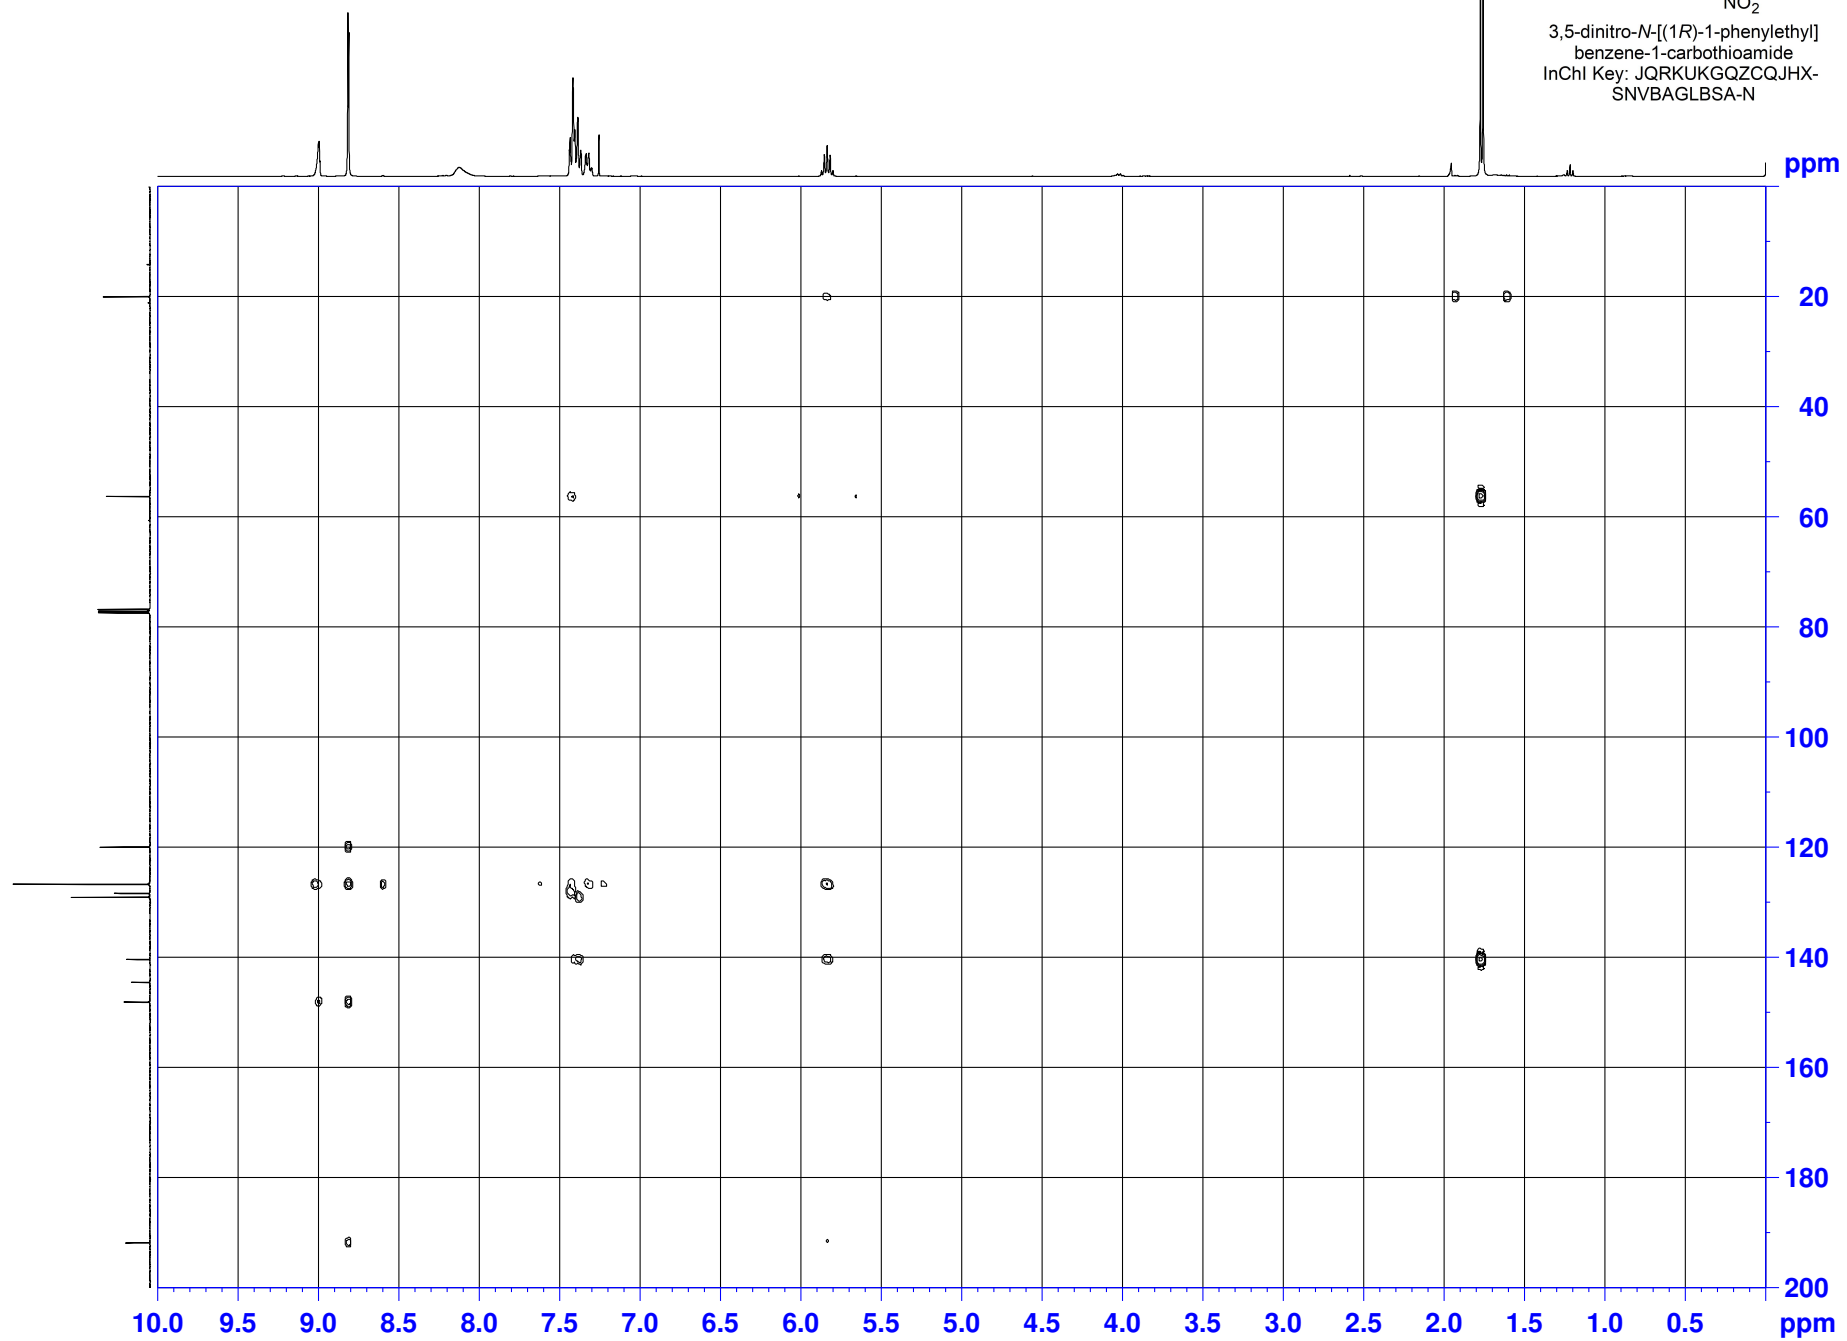

# Mass Spectrum List Report

## Analysis Info

Analysis Name Z:\FTICR-MS\MS-1\Data\2020\apexdata082820\EBC-6-067-1\_pos\_000001.d  
Method  
Sample Name EBC-6-067-1  
Comment EBC-6-067-1 in MeOH C15H13N3O4S Na+  
Acquisition Date 8/28/2020 4:45:57 PM  
Operator FTMS\_USER  
Instrument apex-Qe

Sample Name EBC-6-067-1 in MeOH  
Exact Mass C15H13N3O4S Na+ = 354.051898 m/z  
Mass Observed = 354.052030 m/z

Difference < 1.0 ppm

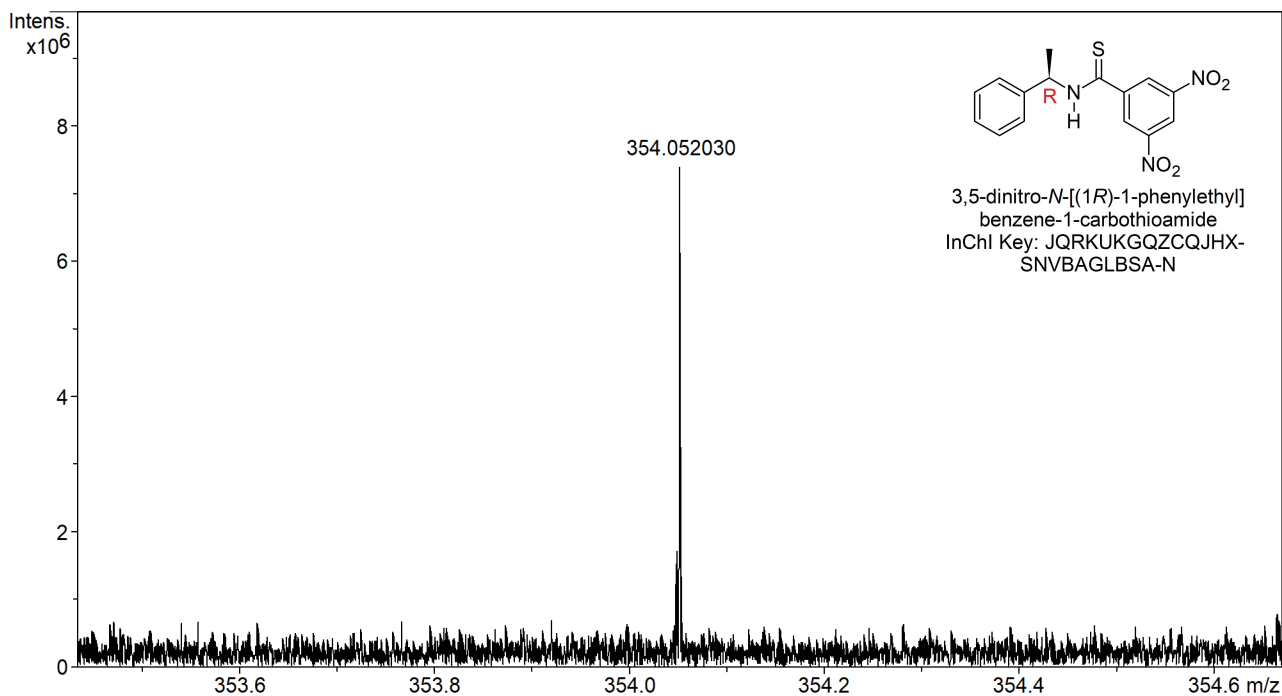

| #  | m/z        | I        |
|----|------------|----------|
| 1  | 141.347114 | 1522262  |
| 2  | 144.081461 | 1496010  |
| 3  | 149.802439 | 1553179  |
| 4  | 153.427171 | 2880642  |
| 5  | 153.459238 | 1511076  |
| 6  | 154.450270 | 3418986  |
| 7  | 174.369974 | 13477814 |
| 8  | 175.927352 | 4470211  |
| 9  | 196.467440 | 1774035  |
| 10 | 196.779641 | 1755750  |
| 11 | 197.303609 | 1714064  |
| 12 | 197.429094 | 1729869  |
| 13 | 197.429994 | 1974800  |
| 14 | 197.462174 | 1803937  |
| 15 | 197.472420 | 1737659  |
| 16 | 198.017662 | 1757629  |
| 17 | 198.289467 | 1900684  |
| 18 | 198.308615 | 1752380  |
| 19 | 198.362267 | 2222468  |
| 20 | 198.378761 | 1783726  |

# Mass Spectrum List Report

| #  | m/z        | I       |
|----|------------|---------|
| 21 | 198.684229 | 1750163 |
| 22 | 198.753977 | 1884707 |
| 23 | 198.783278 | 2314541 |
| 24 | 198.788836 | 1809851 |
| 25 | 198.799065 | 1850069 |
| 26 | 198.813180 | 1734201 |
| 27 | 198.863345 | 1796279 |
| 28 | 198.889956 | 1980411 |
| 29 | 198.901805 | 1794009 |
| 30 | 198.910825 | 1902896 |
| 31 | 198.925340 | 1819604 |
| 32 | 198.957561 | 1895142 |
| 33 | 199.448898 | 1844161 |
| 34 | 199.472875 | 1771517 |
| 35 | 199.478010 | 2148362 |
| 36 | 199.493778 | 2006194 |
| 37 | 199.496363 | 1953273 |
| 38 | 199.532316 | 2049300 |
| 39 | 199.544306 | 1762034 |
| 40 | 199.728335 | 1759875 |
| 41 | 199.891507 | 1847456 |
| 42 | 205.461094 | 1823119 |
| 43 | 205.702015 | 1997278 |
| 44 | 206.092505 | 1856986 |
| 45 | 206.643907 | 1885786 |
| 46 | 206.902345 | 1823181 |
| 47 | 206.927910 | 1817483 |
| 48 | 206.988507 | 1949342 |
| 49 | 207.375095 | 1943171 |
| 50 | 207.431120 | 1984714 |
| 51 | 207.438432 | 1928412 |
| 52 | 207.490337 | 2074905 |
| 53 | 207.491498 | 2121948 |
| 54 | 207.528165 | 1829684 |
| 55 | 207.539521 | 2210639 |
| 56 | 207.543512 | 1847129 |
| 57 | 207.564625 | 1885707 |
| 58 | 207.570376 | 1848473 |
| 59 | 208.187513 | 1857759 |
| 60 | 208.192862 | 1899628 |
| 61 | 212.481491 | 2343574 |
| 62 | 212.482972 | 2721049 |
| 63 | 212.485955 | 1982368 |
| 64 | 212.487277 | 3580323 |
| 65 | 214.257808 | 2088754 |
| 66 | 216.557100 | 2147404 |
| 67 | 216.612020 | 1951930 |
| 68 | 216.700619 | 1903851 |
| 69 | 216.839332 | 2046784 |
| 70 | 216.858642 | 2014886 |
| 71 | 216.859800 | 1947944 |
| 72 | 217.437422 | 1903770 |
| 73 | 217.466496 | 1968595 |
| 74 | 217.650946 | 1920057 |
| 75 | 217.792262 | 2036939 |
| 76 | 262.090769 | 2210325 |
| 77 | 263.004357 | 2026288 |
| 78 | 263.076856 | 1902303 |
| 79 | 263.419985 | 2148957 |
| 80 | 264.218419 | 1932743 |
| 81 | 265.162570 | 1986149 |
| 82 | 265.219428 | 2062368 |
| 83 | 265.254678 | 1987317 |
| 84 | 265.304144 | 2207545 |

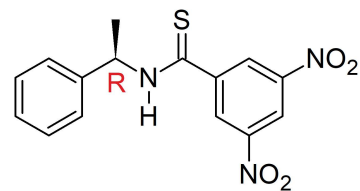

3,5-dinitro-*N*-[(1*R*)-1-phenylethyl]  
benzene-1-carbothioamide  
InChI Key: JQRKUKGQZCQJHX-  
SNVBAGLBSA-N



# Mass Spectrum List Report

| #   | m/z        | I        |
|-----|------------|----------|
| 85  | 265.343919 | 2004617  |
| 86  | 265.531329 | 2037796  |
| 87  | 265.561466 | 1906559  |
| 88  | 265.570000 | 2252660  |
| 89  | 265.572528 | 2174577  |
| 90  | 275.998638 | 5727208  |
| 91  | 284.331227 | 13858511 |
| 92  | 285.334671 | 2803567  |
| 93  | 288.636284 | 1774976  |
| 94  | 288.667864 | 1840962  |
| 95  | 288.688558 | 1807385  |
| 96  | 288.702298 | 1796605  |
| 97  | 288.704368 | 2238202  |
| 98  | 288.732708 | 2080194  |
| 99  | 288.792246 | 1843788  |
| 100 | 290.312254 | 1767290  |
| 101 | 290.681372 | 1785492  |
| 102 | 290.896472 | 1849314  |
| 103 | 292.228509 | 1801935  |
| 104 | 292.883047 | 1791376  |
| 105 | 292.904314 | 1902309  |
| 106 | 293.268390 | 1766646  |
| 107 | 294.116888 | 1730071  |
| 108 | 295.139512 | 1705022  |
| 109 | 295.343707 | 2070290  |
| 110 | 295.383807 | 1857981  |
| 111 | 295.410737 | 1726341  |
| 112 | 295.445005 | 1830460  |
| 113 | 295.479939 | 1805811  |
| 114 | 295.831442 | 1731598  |
| 115 | 295.952743 | 1718158  |
| 116 | 296.164533 | 1811279  |
| 117 | 296.279669 | 1919323  |
| 118 | 296.398117 | 2013536  |
| 119 | 296.435638 | 1964048  |
| 120 | 296.440027 | 1704967  |
| 121 | 296.468432 | 1739979  |
| 122 | 296.659409 | 1661494  |
| 123 | 296.696446 | 1791975  |
| 124 | 296.817042 | 1902823  |
| 125 | 297.216544 | 1761684  |
| 126 | 297.313548 | 1656773  |
| 127 | 297.484629 | 1743960  |
| 128 | 297.602765 | 1783131  |
| 129 | 297.683382 | 1683375  |
| 130 | 297.819259 | 1909644  |
| 131 | 297.901773 | 1717083  |
| 132 | 297.932090 | 1822618  |
| 133 | 297.980310 | 1663411  |
| 134 | 298.126136 | 1703674  |
| 135 | 298.180465 | 1995653  |
| 136 | 298.351166 | 1690135  |
| 137 | 298.357099 | 1787914  |
| 138 | 298.380970 | 1720534  |
| 139 | 298.416654 | 1689738  |
| 140 | 298.655871 | 1663623  |
| 141 | 298.681946 | 2002127  |
| 142 | 298.683842 | 1944395  |
| 143 | 298.709713 | 1755027  |
| 144 | 298.740191 | 1703121  |
| 145 | 298.746856 | 1689667  |
| 146 | 298.777807 | 1813120  |
| 147 | 304.299996 | 3242296  |
| 148 | 308.210046 | 1553401  |

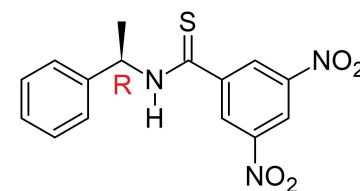

3,5-dinitro-N-[(1R)-1-phenylethyl]  
benzene-1-carbothioamide  
InChI Key: JQRKUKGQZCQJHX-  
SNVBAGLBSA-N

# Mass Spectrum List Report

| #   | m/z        | I       |
|-----|------------|---------|
| 149 | 308.420610 | 1557277 |
| 150 | 314.030708 | 1497787 |
| 151 | 314.840435 | 1522429 |
| 152 | 314.859347 | 1549009 |
| 153 | 314.915376 | 1776209 |
| 154 | 314.927032 | 1476150 |
| 155 | 317.563709 | 1463448 |
| 156 | 317.666744 | 1541548 |
| 157 | 324.077898 | 2509650 |
| 158 | 325.878807 | 1755983 |
| 159 | 330.481559 | 1372868 |
| 160 | 332.070068 | 1350768 |
| 161 | 332.331221 | 2594477 |
| 162 | 337.439951 | 1480330 |
| 163 | 337.852251 | 1286548 |
| 164 | 338.074868 | 4096439 |
| 165 | 339.704222 | 1314599 |
| 166 | 340.051753 | 6399816 |
| 167 | 340.398568 | 1585517 |
| 168 | 341.055025 | 1288202 |
| 169 | 353.266183 | 1228946 |
| 170 | 354.048820 | 1780974 |
| 171 | 354.052030 | 7500520 |
| 172 | 355.055289 | 1614786 |
| 173 | 360.323793 | 1925069 |
| 174 | 365.105660 | 1379742 |
| 175 | 368.425148 | 1878055 |
| 176 | 370.026018 | 3782458 |
| 177 | 370.046979 | 5544220 |
| 178 | 371.315905 | 1044546 |
| 179 | 372.243729 | 995168  |
| 180 | 385.292625 | 1371340 |
| 181 | 386.399365 | 1177373 |
| 182 | 391.284457 | 1005600 |
| 183 | 393.209706 | 1308585 |
| 184 | 393.297716 | 9434745 |
| 185 | 393.308830 | 1171571 |
| 186 | 394.301047 | 2279015 |
| 187 | 395.658278 | 926302  |
| 188 | 398.241543 | 1006313 |
| 189 | 401.266512 | 1257130 |
| 190 | 402.357969 | 1784277 |
| 191 | 403.999925 | 1901287 |
| 192 | 406.158537 | 1733692 |
| 193 | 408.308565 | 2348069 |
| 194 | 409.183603 | 3692611 |
| 195 | 409.271634 | 5199943 |
| 196 | 410.275074 | 1169286 |
| 197 | 413.266368 | 6009309 |
| 198 | 414.215435 | 1363318 |
| 199 | 414.269741 | 1766527 |
| 200 | 414.430603 | 2194587 |
| 201 | 415.254044 | 953140  |
| 202 | 418.015721 | 1373587 |
| 203 | 421.328907 | 1186323 |
| 204 | 424.019227 | 982354  |
| 205 | 424.282526 | 1372839 |
| 206 | 426.357821 | 1198683 |
| 207 | 428.373592 | 2436628 |
| 208 | 429.240189 | 3064645 |
| 209 | 429.318787 | 2512225 |
| 210 | 430.389296 | 1960669 |
| 211 | 433.380563 | 3872002 |
| 212 | 434.383930 | 2016867 |

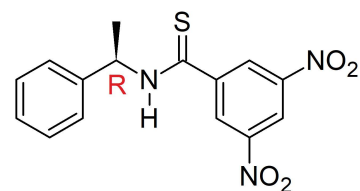

3,5-dinitro-N-[(1R)-1-phenylethyl]  
benzene-1-carbothioamide  
InChI Key: JQRKUKGQZCQJHX-  
SNVBAGLBSA-N
